# Supplementary material for: HIV Care Continuum Among People Living With HIV and History of Arrest and Mental Health Diagnosis
Source: PubMed Central journal article supplement — J Acquir Immune Defic Syndr. 2023 Nov 10;94(5):403–11. doi: 10.1097/QAI.0000000000003296 (PMC10642694; doi:10.1097/qai.0000000000003296), 2023-11-10
Supplement: qai-94-403-s001.pdf [file qai-94-403-s001.pdf]

**Supplemental Digital Content 1.** Post Hoc Analysis: Adjusted Odds of Retention in Care and Undetectable Viral Load by Arrest, Mental Health Diagnosis, Substance Use, and Clinical Care Utilization (All Types) for People Living with HIV in Marion County, Indiana in 2018 (n=5140).

| Model                             | Outcome: Odds of retention in care |              |              |                 | Outcome: Odds of undetectable viral load |              |              |                 |
|-----------------------------------|------------------------------------|--------------|--------------|-----------------|------------------------------------------|--------------|--------------|-----------------|
|                                   | aOR                                | 95% CI       |              | P               | aOR                                      | 95% CI       |              | P               |
| Arrest history                    | 1.16                               | 0.95         | 1.42         | NS              | 0.97                                     | 0.79         | 1.19         | NS              |
| Mental health history             | 1.04                               | 0.88         | 1.23         | NS              | 0.93                                     | 0.79         | 1.10         | NS              |
| Arrest*mental health history      | 1.07                               | 0.81         | 1.41         | NS              | 0.94                                     | 0.71         | 1.25         | NS              |
| Substance use history             | 0.89                               | 0.75         | 1.06         | NS              | <b>0.76</b>                              | <b>0.64</b>  | <b>0.90</b>  | <b>&lt;0.05</b> |
| Routine visits = 1                | 1.05                               | 0.87         | 1.26         | NS              | 1.16                                     | 0.96         | 1.40         | NS              |
| Routine visits = 2                | 1.45                               | 1.15         | 1.84         | NS              | 1.22                                     | 0.97         | 1.55         | NS              |
| Routine visits = 3-4              | 1.34                               | 1.05         | 1.70         | NS              | <b>1.59</b>                              | <b>1.24</b>  | <b>2.04</b>  | <b>&lt;0.05</b> |
| Routine visits = 5-8              | 1.29                               | 0.95         | 1.75         | NS              | 1.49                                     | 1.09         | 2.03         | NS              |
| Routine visits = 9+               | 1.43                               | 1.00         | 2.02         | NS              | 1.26                                     | 0.89         | 1.79         | NS              |
| Outpatient visits = 1-9           | <b>4.82</b>                        | <b>3.52</b>  | <b>6.60</b>  | <b>&lt;0.05</b> | <b>5.20</b>                              | <b>3.83</b>  | <b>7.06</b>  | <b>&lt;0.05</b> |
| Outpatient visits = 10-24         | <b>7.25</b>                        | <b>5.25</b>  | <b>10.01</b> | <b>&lt;0.05</b> | <b>9.71</b>                              | <b>7.10</b>  | <b>13.30</b> | <b>&lt;0.05</b> |
| Outpatient visits = 25-49         | <b>11.82</b>                       | <b>8.52</b>  | <b>16.40</b> | <b>&lt;0.05</b> | <b>14.92</b>                             | <b>10.82</b> | <b>20.57</b> | <b>&lt;0.05</b> |
| Outpatient visits = 50-99         | <b>14.74</b>                       | <b>10.35</b> | <b>20.99</b> | <b>&lt;0.05</b> | <b>19.85</b>                             | <b>14.00</b> | <b>28.13</b> | <b>&lt;0.05</b> |
| Outpatient visits = 100+          | <b>17.44</b>                       | <b>11.46</b> | <b>26.53</b> | <b>&lt;0.05</b> | <b>28.58</b>                             | <b>18.76</b> | <b>43.52</b> | <b>&lt;0.05</b> |
| Inpatient stays = 1               | 1.14                               | 0.94         | 1.39         | NS              | 1.26                                     | 1.03         | 1.54         | NS              |
| Inpatient stays = 2               | 0.96                               | 0.78         | 1.18         | NS              | 0.86                                     | 0.70         | 1.07         | NS              |
| Inpatient stays = 3-4             | 1.13                               | 0.91         | 1.41         | NS              | 0.95                                     | 0.76         | 1.19         | NS              |
| Inpatient stays = 5-24            | <b>0.70</b>                        | <b>0.57</b>  | <b>0.87</b>  | <b>&lt;0.05</b> | 0.84                                     | 0.68         | 1.04         | NS              |
| Inpatient stays = 25+             | 0.60                               | 0.32         | 1.14         | NS              | 0.56                                     | 0.29         | 1.08         | NS              |
| Emergency department visits = 1   | 1.09                               | 0.88         | 1.34         | NS              | 1.08                                     | 0.88         | 1.33         | NS              |
| Emergency department visits = 2   | 1.16                               | 0.92         | 1.46         | NS              | 1.23                                     | 0.97         | 1.55         | NS              |
| Emergency department visits = 3-4 | 1.04                               | 0.83         | 1.30         | NS              | 0.96                                     | 0.77         | 1.20         | NS              |
| Emergency department visits = 5-8 | 1.06                               | 0.85         | 1.32         | NS              | 0.98                                     | 0.79         | 1.22         | NS              |
| Emergency department visits = 9+  | 1.22                               | 0.97         | 1.54         | NS              | 0.85                                     | 0.67         | 1.07         | NS              |

Notes. aOR = adjusted odds ratio; CI = confidence interval; Exponentiated coefficients; Bonferroni-corrected p-values; Multivariable logistic regression models adjusted for age, race/ethnicity, and sex. 143 observations were deleted due to missing values for the response or explanatory variables.
